# Supplementary material for: Supplementation of Foals with a Saccharomyces cerevisiae Fermentation Product Alters the Early Response to Vaccination
Source: MDPI journal article supplement (doi:10.3390/ani14060960), 2024-03-20
Supplement: s1 [file s1]

**Table S1.** Average age and parity of mares.

|                    | N               | Mean Age<br>(Min-Max) | Mean Parity<br>(Min-Max) |
|--------------------|-----------------|-----------------------|--------------------------|
| <b>Group (OLI)</b> | 11 <sup>1</sup> | 11 (4 - 18)           | 3.45 (0 - 6)             |
| <b>Group (PLA)</b> | 11 <sup>2</sup> | 11 (4 - 18)           | 3.64 (0 - 6)             |

<sup>1</sup>one foal had to be euthanized after intensive colic treatment before weaning; <sup>2</sup>one foal died 3 days after birth

**Table S2.** Feces scoring system and diarrhea severity.

| Score | Feces consistence | Severity points |
|-------|-------------------|-----------------|
| 1     | Watery            | 4               |
| 2     | Thin mushy        | 3               |
| 3     | Mushy pasty       | 1               |
| 4     | Formed            | 0               |

Score 1 + 2 were classified as diarrhea.

**Table S3.** Vaccination groups.

| A) Vaccination<br>Oct 4 <sup>th</sup> 2022 |                       |              | B) Vaccination<br>Nov 8 <sup>th</sup> 2022 |          |              |
|--------------------------------------------|-----------------------|--------------|--------------------------------------------|----------|--------------|
| Foal                                       | OLI/ PLA <sup>1</sup> | Age (months) | Foal                                       | OLI/ PLA | Age (months) |
| 1                                          | OLI                   | 8            | 8                                          | OLI      | 9            |
| 2                                          | OLI                   | 8            | 10                                         | PLA      | 8            |
| 3                                          | PLA                   | 8            | 13                                         | PLA      | 7            |
| 4                                          | PLA                   | 8            | 14                                         | OLI      | 7            |
| 5                                          | PLA                   | 8            | 15                                         | PLA      | 7            |
| 6                                          | OLI                   | 8            | 16                                         | PLA      | 6            |
| 7                                          | OLI                   | 8            | 17                                         | OLI      | 6            |
| 9                                          | PLA                   | 7            | 19                                         | OLI      | 6            |
| 11                                         | PLA                   | 6            | 20                                         | OLI      | 6            |
| 12                                         | OLI                   | 6            | 22                                         | PLA      | 6            |
| Mean ± s                                   |                       | 7.5 ± 0.85   |                                            |          | 6.8 ± 1.03   |

1) Foals were fed a SFCP (OLI) or a placebo (PLA) between day 2 until day 30 post partum.

**Table S4.** Foal appearance and rectal temperatures.

| Foal | Day | Rectal body temp. | Coat         | Nutritional condition | Feces      | Limbs                    | Behavior <sup>1</sup> |
|------|-----|-------------------|--------------|-----------------------|------------|--------------------------|-----------------------|
| 1    | 2   | 38.5              | plushy       | good                  | formed     | normal                   | normal                |
|      | 15  | 38.2              | smooth       | well nourished        | formed     | normal                   | twitchy               |
|      | 30  | 38.2              | smooth       | well nourished        | formed     | normal                   | normal                |
| 2    | 2   | 38.4              | normal       | skinny                | formed     | toe-wide                 | normal                |
|      | 15  | 38.3              | plushy dull  | good                  | formed     | normal                   | normal                |
|      | 30  | 38.2              | plushy dull  | good                  | formed     | nearly normal            | normal                |
| 3    | 2   | 38.3              | plushy       | good                  | formed     | normal                   | normal                |
|      | 15  | 38.4              | smooth       | good                  | formed     | normal                   | pithy                 |
|      | 30  | 38.2              | plushy       | well nourished        | formed     | normal                   | normal                |
| 4    | 2   | 38.3              | plushy       | good                  | formed     | soft pastern             | weary                 |
|      | 15  | 38.4              | normal       | good                  | soft       | soft                     | sleeps a lot          |
|      | 30  | 38.2              | dense        | good                  | formed     | improved                 | weary                 |
| 5    | 2   | 38.1              | smooth       | good                  | formed     | normal                   | vital                 |
|      | 15  | 38.8              | smooth       | good                  | formed     | malposition              | weary                 |
|      | 30  | 38.2              | dissimilar   | good                  | formed     | nearly normal            | calm                  |
| 6    | 2   | 38.4              | plushy       | good                  | formed     | hind legs round          | normal                |
|      | 15  | 38.3              | firm         | good                  | formed     | normal                   | sensible              |
|      | 30  | 38.0              | dense        | burly                 | formed     | normal                   | explosive             |
| 7    | 2   | 38.4              | normal       | good                  | formed     | hind legs minimal soft   | normal                |
|      | 15  | 38.5              | plushy dull  | good                  | formed     | toe in the air           | agile                 |
|      | 30  | 38.2              | dull         | good                  | formed     | still remains            | calm, stubborn        |
| 8    | 2   | 38.3              | smooth       | good                  | formed     | normal                   | pithy                 |
|      | 15  | 38.4              | smooth       | good                  | watery     | normal                   | normal                |
|      | 30  | 38.2              | dense        | good                  | formed     | normal                   | normal                |
| 9    | 2   | 38.4              | normal       | good                  | formed     | normal                   | bright                |
|      | 15  | 38.1              | normal       | good                  | formed     | normal                   | powerful              |
|      | 30  | 38.1              | smooth dense | well nourished        | formed     | normal                   | powerful              |
| 10   | 2   | 38.4              | dense        | well nourished        | formed     | hind legs soft           | calm                  |
|      | 15  | 38.4              | dull         | skinny                | formed     | normal                   | normal                |
|      | 30  | 38.2              | smooth       | good                  | formed     | normal                   | strong, calm          |
| 11   | 2   | 38.5              | smooth       | good                  | formed     | a bit steep              | strong                |
|      | 15  | 38.3              | smooth dense | good                  | formed     | normal                   | strong                |
|      | 30  | 38.3              | smooth dense | good, burly           | formed     | normal                   | strong, calm          |
| 12   | 2   | 38.6              | normal       | good                  | formed     | hind right leg windswept | calm                  |
|      | 15  | 38.1              | shaggy       | good                  | thin mushy | normal                   | strong                |
|      | 30  | 38.1              | shaggy       | good                  | formed     | normal                   | strong                |

**Table S4.** Continued.

|    |    |      |                  |        |                        |                                 |            |
|----|----|------|------------------|--------|------------------------|---------------------------------|------------|
| 13 | 2  | 38.4 | smooth           | tender | formed                 | normal                          | normal     |
|    | 15 | 38.2 | dense            | burly  | formed                 | normal                          | strong     |
|    | 30 | 38.2 | dense,<br>dull   | burly  | formed                 | normal                          | normal     |
| 14 | 2  | 38.6 | normal           | good   | formed                 | normal                          | shy        |
|    | 15 | 38.2 | dense,<br>dull   | good   | formed                 | normal                          | twitchy    |
|    | 30 | -    | dense,<br>dull   | good   | formed                 | normal                          | calm       |
| 15 | 2  | 38.7 | dense,<br>smooth | good   | formed                 | steep, esp. hind<br>legs        | normal     |
|    | 15 | 38.2 | smooth           | good   | formed                 | normal                          | anxious    |
|    | 30 | 38.2 | smooth           | good   | formed                 | normal                          | normal     |
| 16 | 2  | 38.7 | smooth           | skinny | formed                 | normal                          | normal     |
|    | 15 | 38.2 | smooth           | good   | watery                 | normal                          | normal     |
|    | 30 | 38.0 | dull             | good   | formed                 | normal                          | normal     |
| 17 | 2  | 38.4 | short            | good   | formed                 | hind legs soft                  | calm       |
|    | 15 | 38.3 | short            | good   | watery –<br>thin mushy | hind legs round                 | paranoid   |
|    | 30 | 38.2 | short            | good   | formed                 | normal                          | normal     |
| 18 | 2  | 38.4 | dense            | good   | formed                 | hind legs soft                  | calm, shy  |
|    | 15 | 38.3 | dense,<br>long   | good   | formed                 | hind legs soft                  | calm, shy  |
|    | 30 | 38.1 | dense,<br>smooth | good   | formed                 | hind legs round                 | calm, shy  |
| 19 | 2  | 38.7 | slightly<br>open | good   | formed                 | hind legs soft                  | normal     |
|    | 15 | 38.4 | dense,<br>smooth | good   | formed                 | normal                          | calm       |
|    | 30 | -    | dense,<br>smooth | good   | formed                 | normal                          | calm       |
| 20 | 2  | 38.6 | dense            | good   | formed                 | long, soft<br>pastern           | calm       |
|    | 15 | -    | dense            | good   | formed                 | significantly<br>higher         | calm       |
|    | 30 | -    | dense            | good   | formed                 | normal                          | calm       |
| 22 | 2  | -    | short,<br>dense  | good   | formed                 | flexor tendon<br>contracture    | calm       |
|    | 15 | -    | short,<br>dense  | slim   | formed                 | long shoulder<br>hind legs soft | fast, calm |
|    | 30 | -    | dense,<br>smooth | good   | formed                 | normal                          | calm       |

1) Strong: strong character, calm in head, good to handle. Powerful: strong but more difficult to handle. Explosive: very powerful and nearly not to handle. Pithy: robust, fresh, a little stubborn. Twitchy: tensed, jumpy on contact.

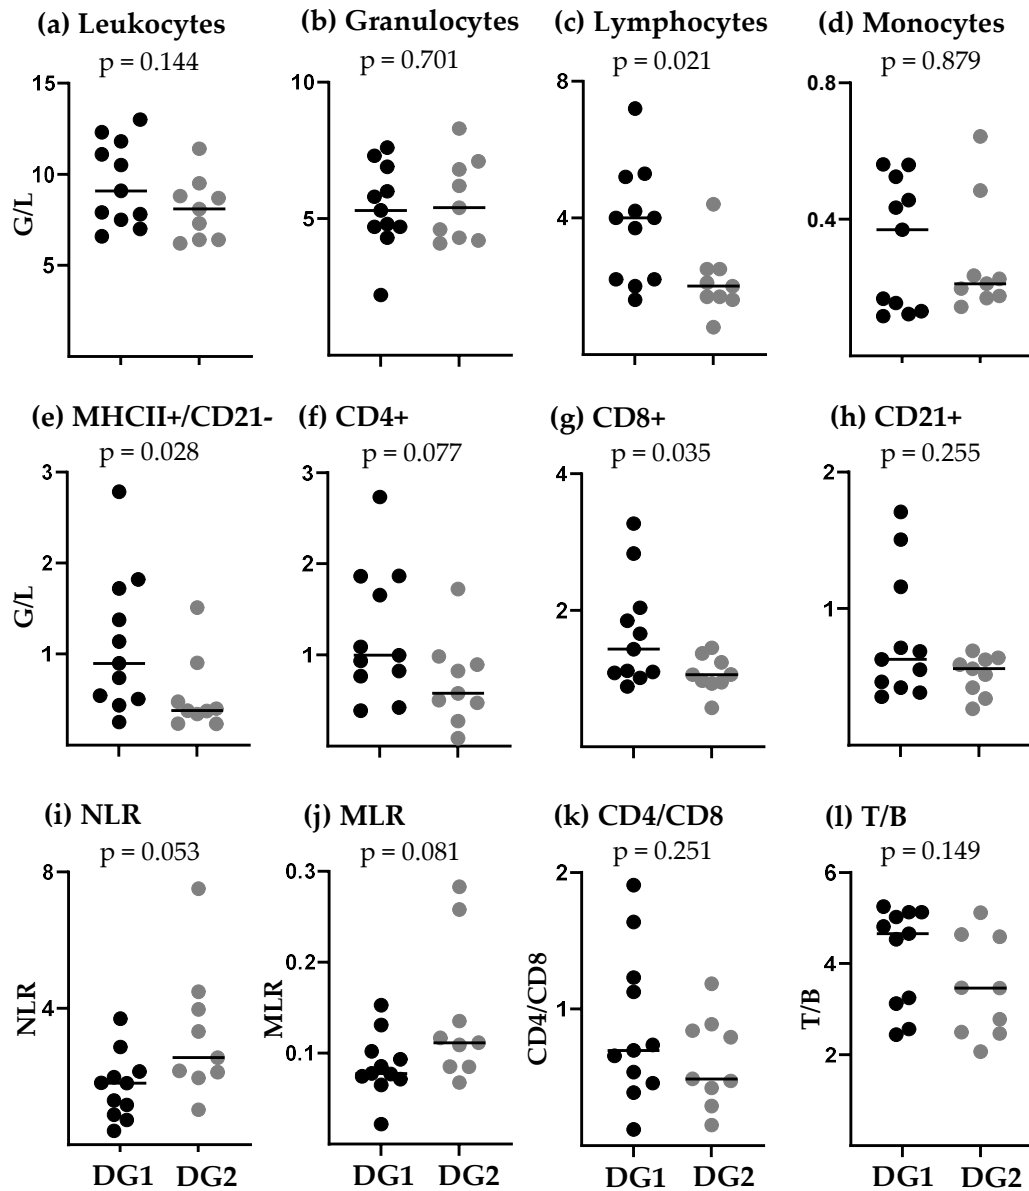

**Figure S1.** Numbers of major leukocyte populations, leukocyte subpopulations (G/L, giga/liter) and ratios between leukocytes in blood of foals before vaccination at the age of 6-9 months. Foals were grouped according to the severity and duration of foal heat diarrhea (DG1, diarrhea group 1, n = 11, 0-5 days of diarrhea; DG2, diarrhea group 2, n = 9, 6-8 days of diarrhea). Total leukocyte numbers (a) were determined in a counting chamber and were used to calculate absolute numbers of leukocyte subpopulations (b-h) after flow cytometric measurement of their fraction among leukocytes (e: MHC-II+ and CD21- lymphocytes; f: CD4+ T cells; g: CD8+ T cells; h: CD21+ B cells). i-l: Ratios between neutrophils and lymphocytes (i: NLR), monocytes and lymphocytes (j: MLR), CD4+ and CD8+ T cells (k: CD4/CD8), T (sum of CD4+ and CD8+ T cells) and B cells (l: T/B). P values were determined by unpaired t-test or Wilcoxon two-sample test.

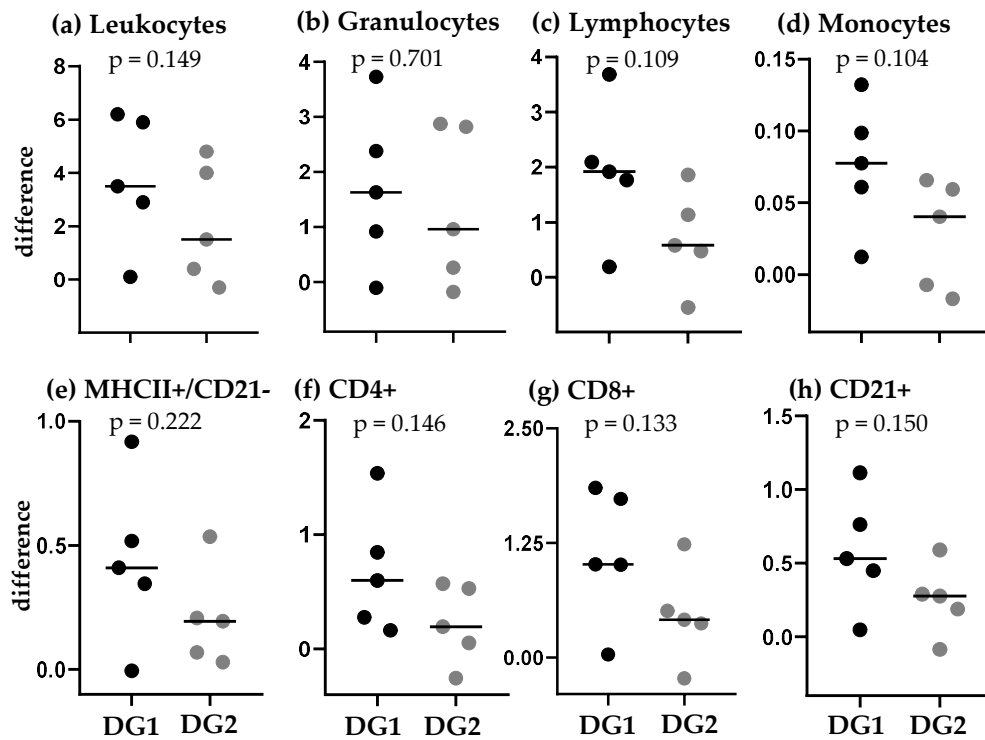

**Figure S2.** Changes in numbers of circulating major leukocyte populations and leukocyte subpopulations within 24h after vaccination of foals. Foals were grouped according to the severity and duration of foal heat diarrhea (DG1, diarrhea group 1, n = 5, 0-5 days of diarrhea; DG2, diarrhea group 2, n = 5, 6-8 days of diarrhea). Total leukocyte numbers (a) were determined in a counting chamber and were used to calculate absolute numbers of leukocyte subpopulations (b-h) after flow cytometric measurement of their fraction among leukocytes. The values show the difference between the absolute numbers number (giga/liter blood) determined after and before vaccination (e: MHC-II+ and CD21- lymphocytes; f: CD4+ T cells; g: CD8+ T cells; h: CD21+ B cells). P values were determined by unpaired t-test or Wilcoxon two-sample test.

Well Preference : User Defined Preferences

Correct  by subtracting a percentage of:

FITC  % PE  % PI  % A647  %

Correct  by subtracting a percentage of:

FITC  % PE  % PI  % A647  %

Correct  by subtracting a percentage of:

FITC  % PE  % PI  % A647  %

Correct  by subtracting a percentage of:

FITC  % PE  % PI  % A647  %

☐ Apply to all samples Apply Close

**Figure S3.** Fluorescence compensation settings (BD Accuri C6 plus Software). Compensation was applied after acquisition of the samples.
